# Supplementary material for: Assessment of Therapeutic Misconception in Older Schizophrenia Patients With a Brief Instrument
Source: Atypon-hosted journal article supplement (doi:10.1176/appi.ajp.163.3.500), 2006-03-01
Supplement: ajp_163_3_500_01.pdf [file ajp_163_3_500_01.pdf]

## Demographic and Clinical Characteristics of 87 Older Schizophrenia Patients

| Characteristic                                                                        | Mean  | SD   | N  | %    |
|---------------------------------------------------------------------------------------|-------|------|----|------|
| Age (years)                                                                           | 56.4  | 5.0  |    |      |
| Education (years)                                                                     | 12.8  | 2.3  |    |      |
| MacArthur Competence Assessment Tool for Clinical Research (MacCAT-CR) subscale score |       |      |    |      |
| Understanding (possible range=0–26)                                                   | 18.1  | 6.2  |    |      |
| Appreciation (possible range=0–6)                                                     | 4.5   | 1.6  |    |      |
| Reasoning (possible range=0–8)                                                        | 5.2   | 2.2  |    |      |
| Choice (possible range=0–2)                                                           | 1.9   | 0.4  |    |      |
| Positive and Negative Syndrome Scale score (N=85)                                     |       |      |    |      |
| Positive subscale (possible range=7–49)                                               | 15.0  | 5.3  |    |      |
| Negative subscale (possible range=7–49)                                               | 14.3  | 5.9  |    |      |
| General subscale (possible range=16–112)                                              | 29.0  | 7.8  |    |      |
| Hamilton Depression Rating Scale score (17-item version) (N=85)                       | 10.7  | 6.5  |    |      |
| Birchwood Insight Questionnaire score (N=84) (possible range=0–16)                    | 11.8  | 3.6  |    |      |
| Mattis Depression Rating Scale raw score (N=82)                                       |       |      |    |      |
| Total (possible range=0–144)                                                          | 128.4 | 11.6 |    |      |
| Attention (possible range=0–37)                                                       | 34.3  | 2.5  |    |      |
| Initiation/perseveration (possible range=0–37)                                        | 32.4  | 4.8  |    |      |
| Construction (possible range=0–6)                                                     | 5.2   | 1.1  |    |      |
| Conceptualization (possible range=0–39)                                               | 35.1  | 3.6  |    |      |
| Memory (possible range=0–25)                                                          | 21.4  | 3.4  |    |      |
| Gender                                                                                |       |      |    |      |
| Female                                                                                |       |      | 25 | 28.7 |
| Male                                                                                  |       |      | 62 | 71.3 |
| Diagnosis                                                                             |       |      |    |      |
| Schizophrenia                                                                         |       |      | 54 | 62.1 |
| Schizoaffective disorder                                                              |       |      | 33 | 37.9 |
| Ethnicity                                                                             |       |      |    |      |
| Caucasian                                                                             |       |      | 71 | 81.6 |
| African American                                                                      |       |      | 7  | 8.0  |
| Hispanic/Latino                                                                       |       |      | 7  | 8.0  |
| Asian American                                                                        |       |      | 1  | 1.1  |
| Other                                                                                 |       |      | 1  | 1.1  |
| Marital status                                                                        |       |      |    |      |
| Single, never married                                                                 |       |      | 39 | 44.8 |
| Divorced or separated                                                                 |       |      | 38 | 43.7 |
| Married                                                                               |       |      | 5  | 5.7  |
| Widowed                                                                               |       |      | 5  | 5.7  |
| Current medications (N=73) <sup>a</sup>                                               |       |      |    |      |
| Antipsychotics                                                                        |       |      | 65 | 89.0 |
| Antidepressants                                                                       |       |      | 35 | 47.9 |
| Mood stabilizers                                                                      |       |      | 24 | 32.9 |
| Side-effect medications                                                               |       |      | 19 | 26.0 |
| Benzodiazepines                                                                       |       |      | 15 | 20.5 |

<sup>a</sup>Numbers total >100% because some patients were taking more than one type of medication.
